# Supplementary material for: Trophic consequences of terrestrial eutrophication for a threatened ungulate
Source: PubMed Central journal article supplement (PMC7893279; doi:10.1098/rspb.2020.2811), 2021-01-20
Supplement: rspb20202811supp1.pdf [file rspb20202811supp1.pdf]

1 **Electronic Supplementary Material for: Trophic consequences of terrestrial eutrophication**  
2 **for a threatened ungulate**

3 Proceedings of the Royal Society of London B, Biological Sciences

4 DOI: 10.1098/rspb.2020.2811

5 Serrouya, R., M. Dickie, C. Lamb, H. van Oort, A. Kelly, C. DeMars, P.D. McLoughlin, N.C.

6 Larter, D. Hervieux, A.T. Ford, S. Boutin.

7

8 **APPENDIX S1.** Pearson Correlation matrix among all variables for the 14 wolf survey units.

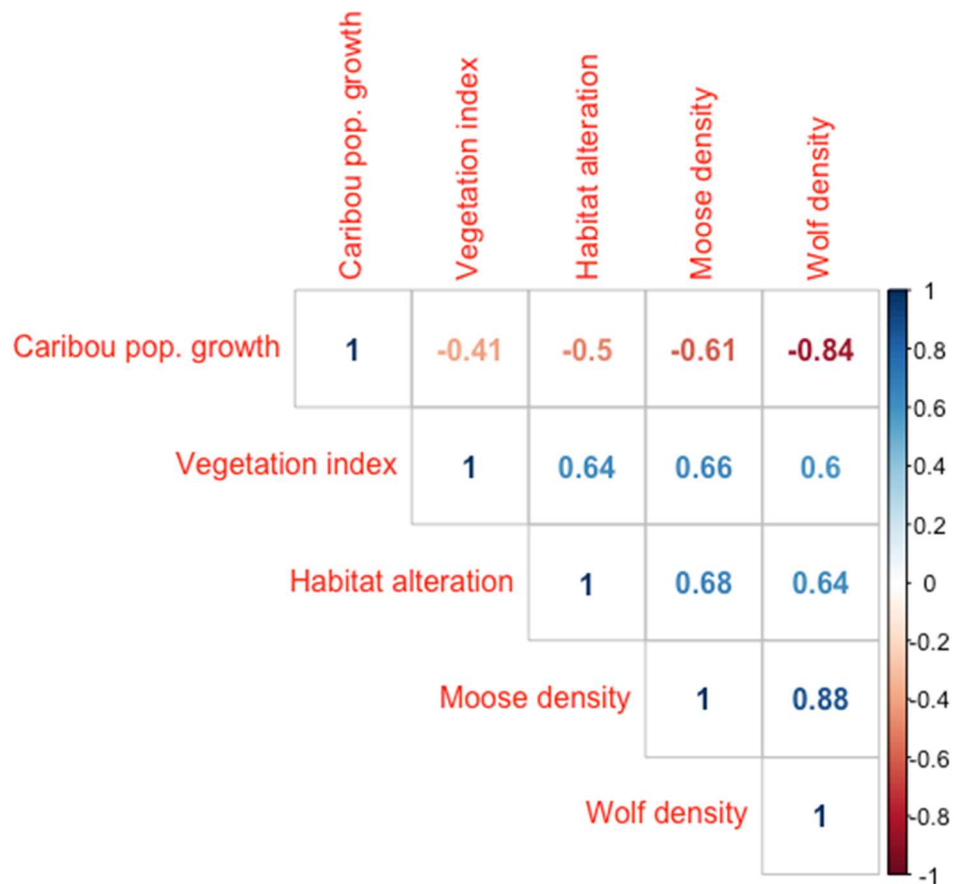

9

10

11 **Figure S1-1.** Pearson correlation matrix of all variables considered in the path analysis. Caribou

12 pop.growth is the caribou population growth rate ( $\lambda$ ), Habitat alteration is the % of wolf survey

13 unit that is altered by human activity, vegetation index is the  $\Delta$ EVI (see main text for  
14 explanation). Code is presented at <https://github.com/ctlamb/borealcaribou-pathanalysis>

15

16 **APPENDIX S2.** Factors affecting the Enhanced Vegetation Index across the study area

17

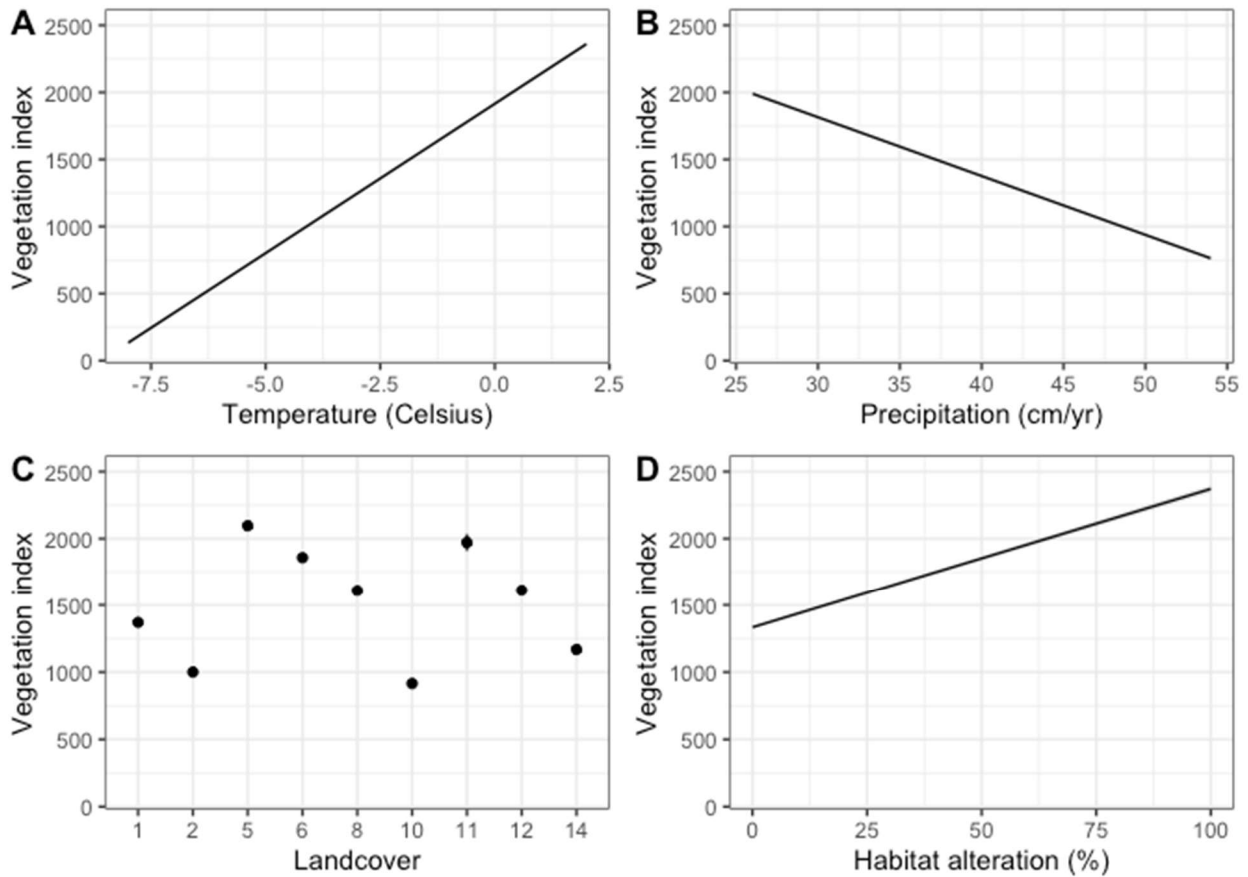

18

19 **Figure S2-1:** Factors predicting the Enhanced Vegetation Index ( $\Delta$ EVI), including temperature

20 (Celsius), precipitation (cm year<sup>-1</sup>), landcover and habitat alteration (%). Predicted linear

21 relationships are depicted for continuous variables, whereas landcover depicts the average  $\Delta$ EVI

22 for each landcover class. Landcover classes are: 1= Temperate or sub-polar needleleaf forest; 2=

23 Sub-polar taiga needleleaf forest; 5= Temperate or sub-polar broadleaf deciduous forest; 6=

24 Mixed forest; 8= Temperate or sub-polar shrubland; 10= Temperate or sub-polar grassland; 11=

25 Sub-polar or polar shrubland-lichen-moss; 12= Sub-polar or polar grassland-lichen-moss; 14=

26 Sub-polar or polar barren-lichen-moss.

27

28 We conducted a spatial analysis of factors that predict the vegetation index ( $\Delta\text{EVI}$ ) across the  
29 598,000-km<sup>2</sup> study area. We used a linear model including all 500-m pixels in the study ( $n >$   
30 127,000). The  $R^2$  was 0.44 ( $F = 9293$ ,  $df = 127088$ ,  $p < 0.0001$ ). P-values are not meaningful  
31 with such high sample size, but the point was to show the magnitude of multiple factors affecting  
32 the vegetation index. This is why we did not link habitat alteration (on its own) directly to  
33 vegetation index in the path analysis (even though they are highly correlated, Appendix S1),  
34 because vegetation index interacts with landcover, temperature, and precipitation. Raw code and  
35 parameter estimates for this analysis are on GitHub: [https://github.com/ctlamb/borealcaribou-](https://github.com/ctlamb/borealcaribou-pathanalysis/tree/master/seral_mechs_spatial)  
36 [pathanalysis/tree/master/seral\\_mechs\\_spatial](https://github.com/ctlamb/borealcaribou-pathanalysis/tree/master/seral_mechs_spatial)  
37

38 **APPENDIX S3: Estimating Moose Densities**

39 We obtained moose densities using aerial moose surveys conducted by provincial governments,  
 40 academic, and industry partners between 2008 and 2018 (Table S3.1). Moose surveys were  
 41 primarily conducted using either the ver Hoef (2008) geospatial or a stratified random block  
 42 design (Gasaway 1986) but distance sampling became more frequently used as of 2010  
 43 (Buckland et al. 2004). Moose density estimates from aerial surveys were not available in the  
 44 Cold Lake Saskatchewan Wolf Survey Unit (WSU). We therefore estimated the density of  
 45 moose using remote wildlife cameras, and corrected camera estimates to aerial survey estimates  
 46 using a correlation analysis. We first evaluated the relationship between moose densities  
 47 estimated using remote wildlife cameras to densities estimated using aerial surveys across  
 48 Alberta, and applied this correction factor to estimated moose densities in Saskatchewan from  
 49 wildlife cameras.

50

51 Table S3.1: Estimated moose density (animals km<sup>-2</sup>) in each Wolf Survey Unit (WSU). The year  
 52 in which the estimate was calculated, method, and citation source are provided.

| WSU # | WSU Name                     | Sub-Area | Moose Density | Year | Method                          | Citation                       |
|-------|------------------------------|----------|---------------|------|---------------------------------|--------------------------------|
| 6     | Fort Liard                   |          | 0.0716        | 2017 | Geospatial<br>Population Survey | Larter, personal communication |
| 8     | Fort Providence<br>South FMA |          | 0.029         | 2012 | Geospatial<br>Population Survey | Kelly, personal communication  |
| 7     | Fort Providence<br>Reference |          | 0.029         | 2012 | Geospatial<br>Population Survey | Kelly, personal communication  |
| 9     | Fort Resolution<br>FMA       |          | 0.013         | 2009 | Geospatial<br>Population Survey | Kelly and Cox, 2017            |
| 10    | Fort Resolution<br>Reference |          | 0.013         | 2009 | Geospatial<br>Population Survey | Kelly and Cox, 2017            |
| 11    | Hay River<br>Lowlands        |          | 0.029         | 2012 | Geospatial<br>Population Survey | Kelly, personal communication  |
| 1     | Calendar                     |          | 0.018         | 2010 | Distance Sampling               | Theisen 2010                   |
| 2     | Chinchaga RRA                |          | 0.157         | 2016 | Distance Sampling               | Webster and Lavellee 2016      |

|    |                        |         |        |           |                                 |                               |
|----|------------------------|---------|--------|-----------|---------------------------------|-------------------------------|
| 3  | Clarke                 |         | 0.074  | 2016      | Distance Sampling               | Webster and Lavellee 2016     |
| 5  | Cold Lake Saskatchewan |         | 0.0789 | 2017      | cameras                         | unpublished data              |
| 12 | Northern Saskatchewan  |         | 0.0457 | 2008-2015 | Aerial surveys, various designs | McLoughlin et al, 2016        |
| 4  | Cold Lake Alberta      | WMU 529 | 0.089  | 2017      | Distance Sampling               | Government of Alberta, 2019   |
| 4  |                        | WMU 512 | 0.3    | 2013      | Stratified Random block         | Government of Alberta, 2018   |
| 4  |                        | WMU 519 | 0.14   | 2015      | Distance Sampling               | Government of Alberta, 2019   |
| 4  |                        | WMU 517 | 0.085  | 2018      | Stratified Random block         | Government of Alberta, 2019   |
| 13 | Whati (TASR Impact)    |         | 0.011  | 2018      | Distance Sampling               | Kelly, personal communication |
| 14 | Jean Marie River       |         | 0.045  | 2018      | Geospatial Population Survey    | Kelly, personal communication |

53

54 To compare density estimates for moose from cameras deployed, we related the estimated moose  
55 density from each of the provincial aerial surveys to estimated moose densities from a wildlife  
56 camera program deployed by the Alberta Biodiversity Monitoring Institute (ABMI) across  
57 Alberta’s boreal forest. The results can be used to correct camera density estimates for moose to  
58 the aerial survey estimates from government surveys within WSUs, to maintain consistency with  
59 density estimates used in the remainder of the analyses.

60

61 ABMI deployed cameras across 1197 sites from 2013 to 2018 across 38 Wildlife Management  
62 Units. Density estimates for moose were calculated for each ABMI camera, using the time-in-  
63 field-of-view method (Laurent et al. 2020), similar to that of methods presented in Nakashima *et*  
64 *al.* (2018). The time-in-field-of-view model uses cumulative time in the camera detection zone to  
65 estimate population density:

66

67

$$D = \frac{\sum(N \cdot T_F)}{A_F \cdot T_O}$$

68

69 Where density  $D$ , is calculated as the total number of individuals observed  $N$  multiplied by the  
70 time in front of the camera field-of-view  $T_F$ , divided by the area of the camera field-of-view  $A_F$   
71 multiplied by the total camera operating time  $T_O$ . The units are animal-seconds per area-seconds,  
72 which equates to the number of animals per area.

73

74 The probability of detecting an animal decreases as the distance from the camera increases, and  
75 this is likely species- and habitat-specific. Therefore, the effective detection distance ( $EDD$ ) in  
76 which each species, in each season was calculated using a prominently coloured pole 5 m from  
77 the camera. All animals were recorded as being closer or farther than the pole, with additional  
78 categories for animals that were uncertain (near 5 m but not directly in line with the pole),  
79 investigating the pole or investigating the camera. The effective detection distance was  
80 calculated using the proportion of locations that were  $< 5$  m away versus  $> 5$  m (excluding the  
81 uncertain and investigating images):  $EDD$  (m) =  $5 / \sqrt{1-p_{>5m}}$ , where  $p_{>5m}$  is the proportion of  
82 images with the species  $> 5$  m away. The area surveyed by a camera is calculated as:

83

$$A_F = \frac{\pi \cdot EDD^2 \cdot \angle}{360}$$

84

85 Where  $A_F$ , in  $m^2$ , is calculated as  $\pi$  multiplied by  $EDD$ , multiplied by the camera field-of-view's  
86 angle in degrees,  $\angle$ , which is  $42^\circ$  with the cameras used here, all of which are divided by  $360^\circ$ .

87

88 Density estimates were calculated for summer and winter seasons and averaged with equal  
89 weight. Average moose density for each Wildlife Management Unit was calculated from all

90 cameras in the Wildlife Management Unit. Confidence intervals were calculated using a  
91 compound distribution of binomial presence/absence and log-normal abundance-given-presence.  
92 Aerial survey estimates were provided by the Government of Alberta. Estimates were provided  
93 with 90% confidence intervals.

94

95 We fit models of camera density as a function of aerial survey density, including Generalized  
96 Additive Models (GAMs) with smoothing splines using both normal and log-normal (log-link)  
97 error distributions, and a linear model both with and without an intercept. Points were weighted  
98 in inverse proportion to the width of the camera confidence intervals, which vary widely due to  
99 large differences in number of cameras per Wildlife Management Units and inherent variability  
100 of camera estimates. Confidence interval width for aerial estimates were a consistent proportion  
101 of the mean estimate, and so we did not weight aerial estimates.

102

103 We omitted one outlying datum with aerial density of  $0.5 \text{ km}^{-2}$  but camera density of  $7.1 \text{ km}^{-2}$ .  
104 The extreme camera estimate is from a Wildlife Management Units with only 4 cameras, and is  
105 largely due to a single camera with an extended visit from one moose. The 90% confidence  
106 intervals for that camera estimate are  $1.4 - 35.3 \text{ km}^{-2}$ , indicating an extremely uncertain estimate.

107 We included one datum with an outlying aerial estimate of  $0.77 \text{ km}^{-2}$  in the analyses.

108

109 There was a general positive relationship between camera estimates and aerial-survey estimates  
110 of moose across Wildlife Management Units, but wide scatter as densities increase (Figure S3.1).  
111 The very wide confidence intervals on the GAM included the linear fit line. The linear models  
112 with and without intercepts were very similar. Because the models produced similar results and



113 the linear model without intercept is the simplest for developing a correction factor, we used the  
114 linear model. The correction factor, 1/slope of the linear model without intercept, was 0.478  
115 (90% Confidence Interval: 0.415 – 0.568). The aerial estimate for moose density in a Wildlife  
116 Management Units is 0.478 times the camera estimate. Equivalently, the camera estimate is 2.09  
117 times higher than the aerial estimate.

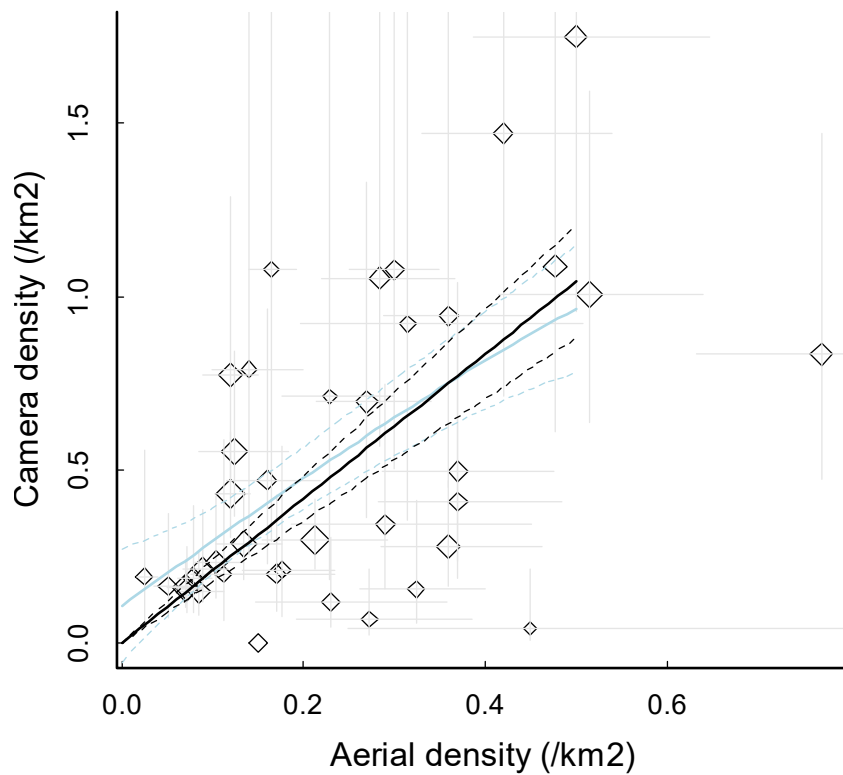

118  
119 **Figure S3-1:** The relationship between moose density (moose  $\text{km}^{-2}$ ) calculated using remote  
120 wildlife cameras and via aerial surveys across Alberta Wildlife Management Units. Thick black  
121 line represents a linear model with no intercept (dotted lines = 90% Confidence Intervals); pale  
122 blue line represents a normal GAM curve (pale grey dotted lines = 90% Confidence Intervals).  
123

124 The substantial overestimation of moose densities by cameras is expected. ABMI cameras are  
125 put in open micro-habitats so that vegetation doesn't hide animals for at least 5 m; moose prefer  
126 those open areas for foraging, particularly in summer. Additionally, moose are attracted to the  
127 cameras themselves, often spending time investigating the camera. This inflates densities  
128 estimates by increasing the time that moose spend in the camera's field-of-view and also reduces  
129 the effective detection distance.

130

131 We applied the correction factor to moose densities estimated in Cold Lake Saskatchewan  
132 caribou range using remote cameras that overlapped the Cold Lake Saskatchewan WSU.  
133 Cameras in the Cold Lake Saskatchewan caribou range were randomly placed within a 12.5 x 4 -  
134 km area, with a minimum spacing of 1 km between each camera. Cameras collected data from  
135 January 2017 to March 2018. We calculated moose density using the approach as described  
136 above for each camera, and averaged across the 25 cameras to get one density estimate for that  
137 region. We estimated the moose density within the Cold Lake Saskatchewan WSU as 0.0789  
138 moose km<sup>-2</sup>. We then corrected the estimated density by multiplying by the correction factor,  
139 0.478, such that  $0.0789 \text{ moose km}^{-2} * 0.478 = 0.0377 \text{ moose km}^{-2}$  or 3.77 moose 100 km<sup>-2</sup>.

140

#### 141 **References**

142 Buckland ST, Anderson DR, Burnham KP, Laake JL, Borchers DL, Thomas L. 2004 *Advanced*  
143 *distance sampling*. Oxford University Press Oxford.

144 Gasaway WC. 1986 *Estimating moose population parameters from aerial surveys*. Fairbanks:  
145 Institute of Arctic Biology.

146 Laurent M, Dickie M, Becker, M, Serrouya R, & Boutin, S. 2020 Evaluating the Mechanisms of

- 147 Landscape Change on White-Tailed Deer Populations. *J. Wildlife Management*, 1–14.  
148 <https://doi.org/10.1002/jwmg.21979>
- 149 Nakashima Y, Fukasawa K, Samejima H. 2018 Estimating animal density without individual  
150 recognition using information derivable exclusively from camera traps. *J. Appl. Ecol.* 55,  
151 735–744.
- 152 Ver Hoef JM. 2008 Spatial methods for plot-based sampling of wildlife populations. *Environ.*  
153 *Ecol. Stat.* **15**, 3–13.  
154

155 **APPENDIX S4:** Estimating Wolf Densities: Spatial simulations to optimize transect spacing and  
156 time since snowfall for aerial surveys

157

158 We attempted to conduct a complete wolf census at each Wolf Survey Unit (WSU) based on the  
159 principle that independent wolf track networks (viewable track segments) will be isolated from  
160 each other and readily countable shortly after snowfall events. We conducted the survey by  
161 flying parallel transects, where the probability of intercepting track networks depended on  
162 transect spacing (survey intensity) and the size of the track network, which in turn was related to  
163 the time since snowfall. There is a trade-off between the expediency of a survey and the level of  
164 intensity at which the survey is conducted.

165

166 To inform survey intensity, and to understand how time elapsed since snowfall prior to surveying  
167 affected detection rates, we examined 12 wolf location time series, each from wolves collared  
168 with GPS collars, from different packs, with collars programmed to record a wolf location every  
169 5 min. We considered only data from December through March to be consistent with winter  
170 survey conditions. Each time series included between 9 and 65 days of tracking (mean = 67 days  
171 per time series).

172

173 To simulate a survey, we extracted a segment from each time series to represent a network of  
174 observable tracks following a snowstorm. We chose the date of segment initiation and the  
175 number of days represented in each segment randomly. Track segments were 1, 2, or 3 days in  
176 length. We superimposed each track segment against a set of simulated survey transects that  
177 were always oriented north-south, positioned randomly in the east-west direction, and spaced 1,

178 2, 3, 5, or 7-km apart. Detection was determined if wolf track segments intercepted a survey  
179 transects at least once.

180

181 We repeated the simulated snow track segment outlined above 100 times for each time series.

182 For each time series, we calculated the proportion of snow track segments that were detected for

183 each combination of transect spacing and segment length. These proportions were presented

184 using box plots. All programming was conducted in R using the following packages: rgdal,

185 lubridate, plyr, reshape, and ggplot2.

186

187 As expected, detection rates increased when transect spacing was reduced and when the number

188 of days included in a track segment increased (figures S4-1). The results indicated that 3 days of

189 tracks are reliably intercepted using transect spacing from 1 to 3 km apart, and that 3-km spacing

190 detects 91.6% of the track networks 2 days following a snowfall. We chose 3-km spacing based

191 on this simulation.

192

193 These estimates are conservative because (1) this analysis was based on a single animal, whereas

194 wolves travelling in packs have multiple tracks at times, and (2), old tracks are often evident

195 under recent snowfall and these are also noted and considered when searching for fresh tracks.

196 Finally, because WSUs were large and surveyed in one effort over several days, track

197 detectability increased over time (e.g., 2, 3, 4, 5 etc. nights worth of tracks as survey progressed).

198

199 After wolf tracks were intercepted along a transect, the tracks were forward-tracked and

200 sometimes back-tracked to count the number of wolves in the group using tracking evidence and

201 visual observations of the wolf packs. Each survey took approximately 3 to 5 days to complete,  
202 depending on weather and the size of the WSU.

203

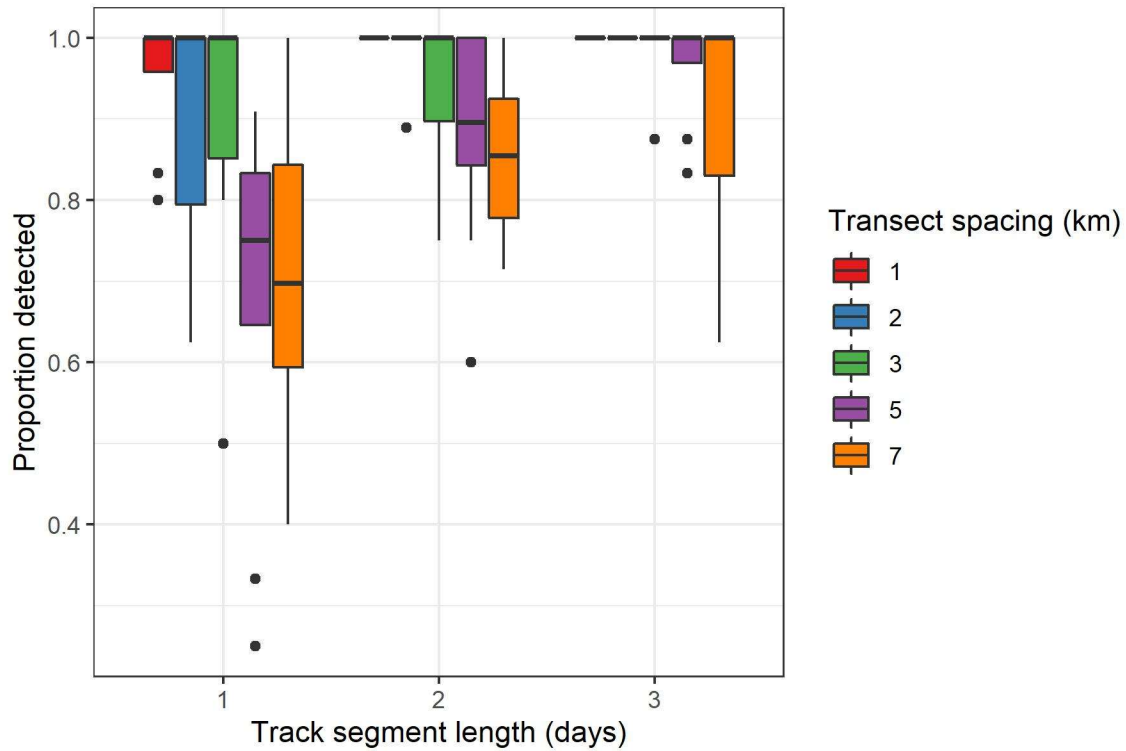

204

205 **Figure S4-1.** The proportion of track segments detected based on their length and transect  
206 spacing (km). The track segment length represents “time since snowfall” to guide when surveys  
207 should begin following a snowfall event.
